# Supplementary material for: Drug Repurposing of Metformin for the Treatment of Haloperidol-Related Behavior Disorders and Oxidative Stress: A Preliminary Study
Source: MDPI journal article supplement (doi:10.3390/pharmaceutics16030403), 2024-03-15
Supplement: s1 [file s1]

**Table S1.** Body weight changes during the 6 weeks period

| Group   |    | Week 1 | Week 2 | Week 3 | Week 4 | Week 5 | Week 6 |
|---------|----|--------|--------|--------|--------|--------|--------|
| CTR     | 1  | 445    | 438    | 444    | 444    | 442    | 442    |
|         | 2  | 439    | 437    | 445    | 446    | 447    | 447    |
|         | 3  | 442    | 434    | 440    | 442    | 449    | 449    |
|         | 4  | 435    | 440    | 440    | 445    | 448    | 448    |
|         | 5  | 440    | 436    | 438    | 441    | 442    | 442    |
|         | 6  | 443    | 439    | 440    | 444    | 446    | 446    |
|         | 7  | 440    | 438    | 438    | 442    | 449    | 449    |
|         | 8  | 441    | 435    | 439    | 440    | 445    | 445    |
|         | 9  | 440    | 438    | 437    | 440    | 447    | 447    |
|         | 10 | 442    | 435    | 437    | 442    | 446    | 446    |
| METF    | 1  | 449    | 446    | 443    | 445    | 445    | 446    |
|         | 2  | 441    | 437    | 437    | 435    | 436    | 436    |
|         | 3  | 446    | 441    | 440    | 442    | 443    | 442    |
|         | 4  | 453    | 447    | 446    | 446    | 448    | 450    |
|         | 5  | 449    | 445    | 444    | 442    | 445    | 445    |
|         | 6  | 447    | 443    | 440    | 441    | 443    | 445    |
|         | 7  | 450    | 447    | 443    | 443    | 445    | 446    |
|         | 8  | 435    | 432    | 430    | 430    | 435    | 434    |
|         | 9  | 445    | 442    | 443    | 445    | 444    | 442    |
|         | 10 | 444    | 439    | 440    | 442    | 440    | 441    |
| HAL     | 1  | 452    | 448    | 448    | 446    | 445    | 448    |
|         | 2  | 447    | 445    | 448    | 450    | 448    | 450    |
|         | 3  | 443    | 440    | 443    | 445    | 445    | 446    |
|         | 4  | 438    | 435    | 435    | 437    | 440    | 439    |
|         | 5  | 448    | 443    | 444    | 446    | 446    | 446    |
|         | 6  | 448    | 446    | 448    | 449    | 448    | 451    |
|         | 7  | 440    | 439    | 437    | 439    | 441    | 442    |
|         | 8  | 446    | 447    | 445    | 447    | 448    | 448    |
|         | 9  | 452    | 448    | 449    | 451    | 449    | 451    |
|         | 10 | 442    | 444    | 442    | 441    | 445    | 446    |
| HALMETF | 1  | 449    | 446    | 445    | 447    | 448    | 447    |
|         | 2  | 438    | 441    | 440    | 443    | 442    | 442    |
|         | 3  | 451    | 447    | 449    | 448    | 447    | 449    |
|         | 4  | 436    | 433    | 435    | 438    | 438    | 439    |
|         | 5  | 446    | 447    | 448    | 446    | 449    | 450    |
|         | 6  | 440    | 442    | 441    | 443    | 442    | 443    |
|         | 7  | 445    | 443    | 445    | 448    | 448    | 447    |
|         | 8  | 447    | 444    | 445    | 447    | 448    | 448    |
|         | 9  | 453    | 452    | 450    | 449    | 448    | 450    |
|         | 10 | 443    | 439    | 440    | 440    | 439    | 441    |

CTR – animals receiving distilled water

METF - animals receiving metformin

HAL - animals receiving haloperidol

HALMETF - animals receiving haloperidol and metformin

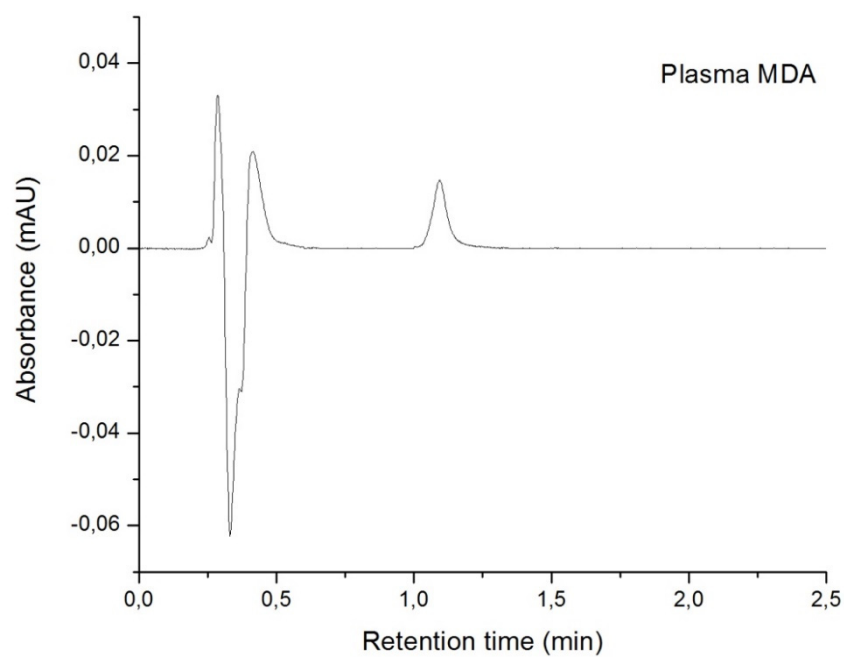

**Figure S1.** Representative chromatogram of plasma MDA level analysis of rats

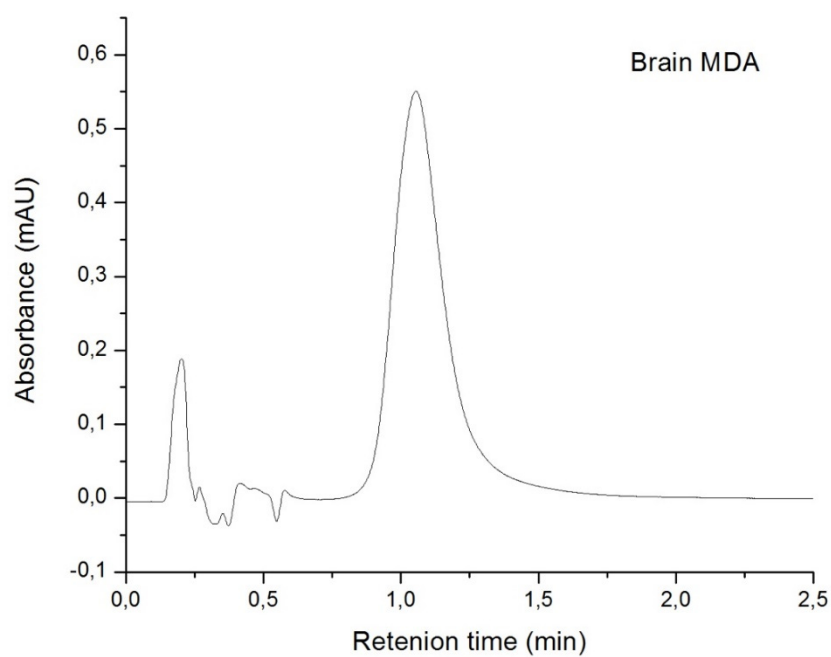

**Figure S2.** Representative chromatogram of brain MDA level analysis of rats

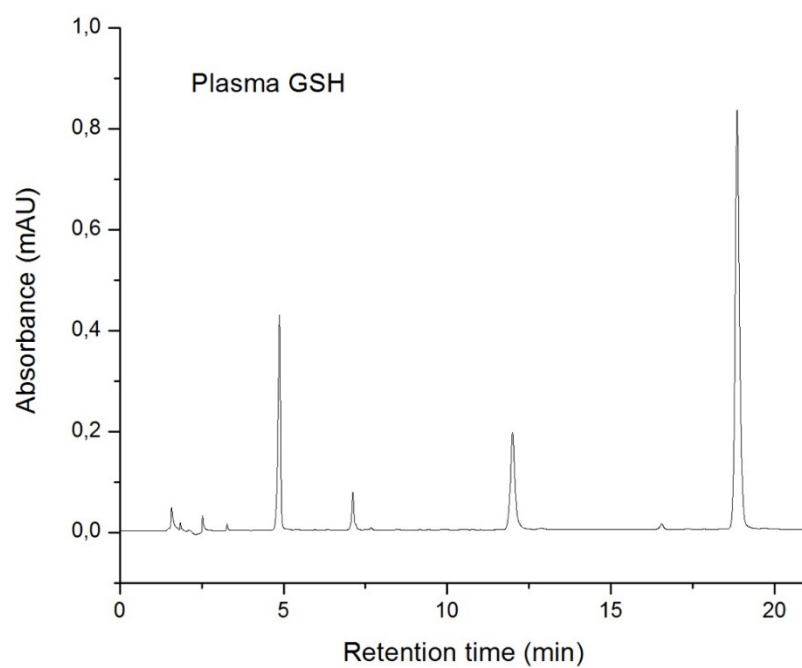

**Figure S3.** Representative chromatogram of plasma GSH analysis of rats

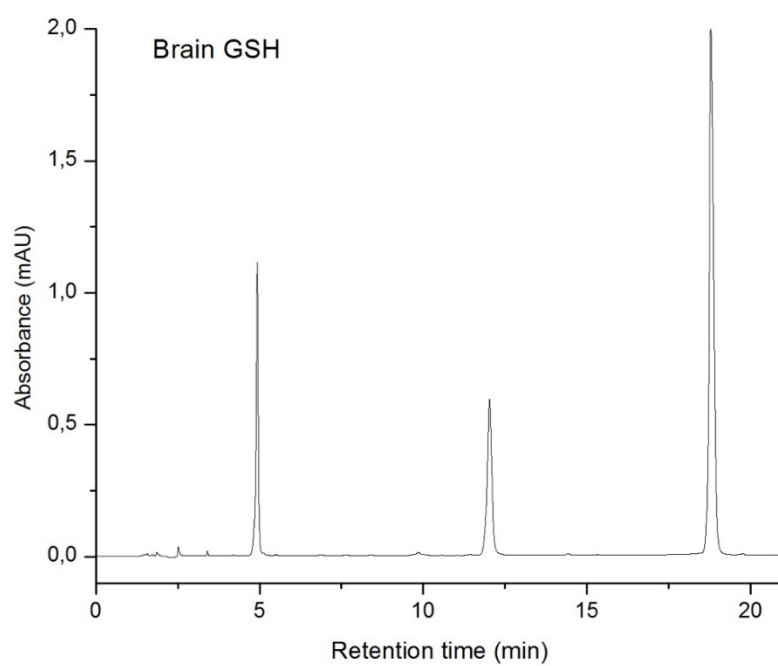

**Figure S4.** Representative chromatogram of brain GSH analysis of rats
